# Supplementary material for: Are People with Obesity Attracted to Multidisciplinary Telemedicine Approach for Weight Management?
Source: MDPI journal article supplement (doi:10.3390/nu14081579), 2022-04-11
Supplement: s1 [file s1]

---

*Participating in this survey, I give my consent to the use of the data I entered anonymously: YES / NO*

**Please indicate your gender \***

F

M

**Insert your age \*\_\_\_**

**Enter your educational level \***

None

Primary school

Secondary school

University

Doctorate, Master, Specialty

**Work activity \***

Student

Employee (public offices, banks, shops, services, etc.)

Worker / Technician

Health worker (healthcare assistant, nurse, doctor)

Entrepreneur

Freelance

Retired

Housewife

Unemployed

**Enter your postcode:\_\_\_\_\_**

**Enter your weight (kg)\*:\_\_\_\_\_**

**Enter your height (m)\*:\_\_\_\_\_**

**Do you suffer from diseases related to excess weight (eg diabetes, respiratory diseases, hypertension, orthopedic disabilities, etc.)?**

Yes

No

---

**You own an electronic tool? (*multiple choices*)**

Yes, smart-phone

Yes, Tablet

Si, PC

No

**Have you cancelled or postponed any scheduled clinical assessments during pandemic?**

Yes

No

**In the impossibility of a visit during this period, have you contacted your doctor for the management of your complications in any other way?**

Yes, by telephone

Yes, by email

Yes, by WhatsApp or phone message

Yes, by video consulting

No, never

**Do you think that in this period a remote medical video consultation could make you run less health risks?**

Yes

No

I don't know

**Do you think your doctor can understand your health through a video consultation?**

Yes

No

I don't know

Yes, but only if he has already met me during a face-to-face visit

**Would you be like to start an online multidisciplinary intervention for weight management?**

Yes

Yes, with known health professional

No

---

I don't know

**Do you think that the cost of the online lifestyle intervention should be provided by the national health system?**

Yes

No

**Would you be willing to do it for a fee?**

Yes

No

It depends on the cost

**Would you be like to continue an online multidisciplinary intervention for weight management, stopped because of pandemic?**

Yes

Yes, but only with known health professional

No

I don't know

**Do you think that the cost of this intervention should be provided by the national health system?**

Yes

No

**Would you be willing to do it for a fee?**

Yes

No

It depends on the cost

**Did you have to take psychological support during the pandemic?**

Yes

No

**Did you have to stop a psychological support during the pandemic?**

Yes

No

---

**Do you think a psychological video consultating could be useful to better manage emotions / stress and nervous hunger in your daily life?**

Yes

No

Yes, but only with known health professional

I don't know

**Would you feel comfortable talking about your emotions to the psychologist via a screen?**

Yes

No

Yes, but only with known health professional

I don't know

**In your opinion, what frequency should psychological support have?**

Once a week

Twice a week

Whenever I feel the need

**Would you undergo a remotely delivered psychological intervention?**

Yes

No

Yes, but only with known health professional

I don't know

**Have you already done diets to manage your weight?**

Yes, at least one

Yes, more than 3

Yes, more than 5

No, never

**Did you have to stop scheduled visits for diet and nutrition during this time?**

Yes

No

---

**Would you will join an online nutritional intervention?**

Yes

No

Yes , but only with known health professional

I don't know

**Which of the following modalities would you like to better follow a diet?**

Individual video consulting once a week

Group video consulting one a week

Individual video consulting, but only when I feel the need

Video recordings, educational / informative material on diet-nutrition / health, to view if necessary

**Do you regularly practice physical activity? If "YES" what type (for example: fitness in the gym, swimming-water aerobics, pilates, postural gymnastics, walking outdoors)?**

Yes (indicate the main physical activity): .....

No

**Have you ever attended "remote" physical activity classes (for example: postural gymnastics, pilates, yoga, etc)?**

Yes, with real-time online lessons

Yes, with recorded lessons

No, never

**Would you like to practise physical activity, online, supervised by an exercise physiologist??**

Yes

No

I don't know

**What could prevent you from exercising online? (as many answers as possible)**

- laziness
- the lack of proper space at home
- the lack of a computer-tablet-smartphone to connect
- difficulty to use the electronic tools to connect

---

-fear of getting

- nothing, I would gladly do it

**Which of the following modalities would you prefer to practise physical activity at home?**

Real-time online group lessons, once a week

Real-time online individual lessons, once a week

Reception of training tables and one-to-one meetings via the video platform with an exercise physiologist, once a week
